# Supplementary material
Source: publisher figshare collection journal article supplement (https://brill.figshare.com/ndownloader/files/38140551)
Supplement: Supplementary file 1 [file 38140551]

| **Document ID:**  GizaCARD record number for this document | **Date:**  Date of document compilation or most recent update. |
| --- | --- |
| **Model Title:**  Name of the model, subject, or project. | **Model ID:**  GizaCARD record number for the model |
| **Model Type:** 3D-graphic model; reconstruction |  |

**MAPS/PLANS, WIRE-FRAME, GREY MODEL**

Figure 1. [CAPTION]

**TEXTURE MAPPING, COLORING, LIGHTING**

Figure 2. [CAPTION]

**FINISHED MODEL (EXTERIOR)**

Figure 3. [CAPTION]

**FINISHED MODEL (INTERIOR)**

Figure 4. [CAPTION]
